# Supplementary material for: FBXO11 governs macrophage cell death and inflammation in response to bacterial toxins
Source: PubMed Central journal article supplement (PMC10053445; doi:10.26508/lsa.202201735), 2023-03-28

Figure 5C  
[Uncropped]

IL-1 $\beta$  (lysate)

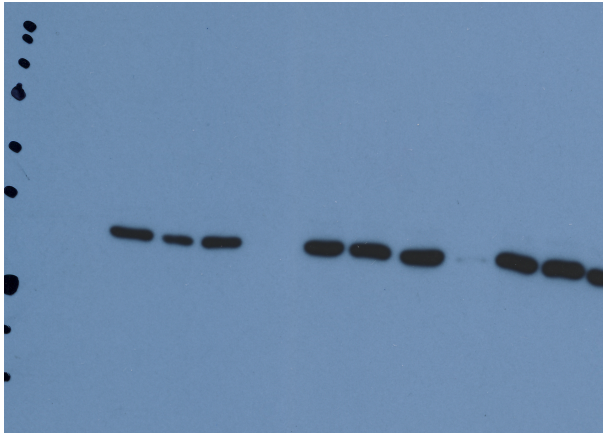

$\beta$ -actin

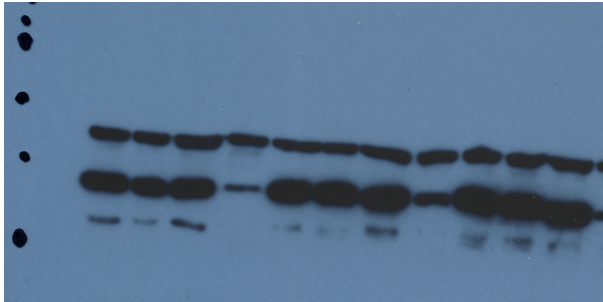

IL-1 $\beta$  (supernatant – long exposure)

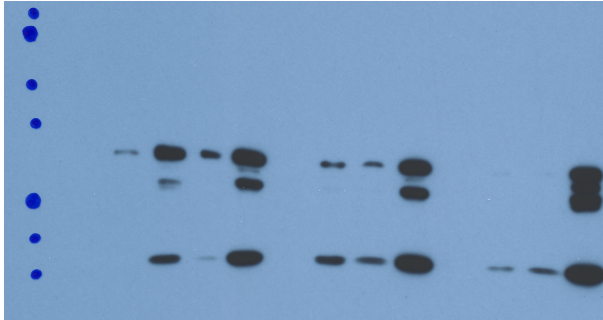

IL-1 $\beta$  (supernatant – short exposure)

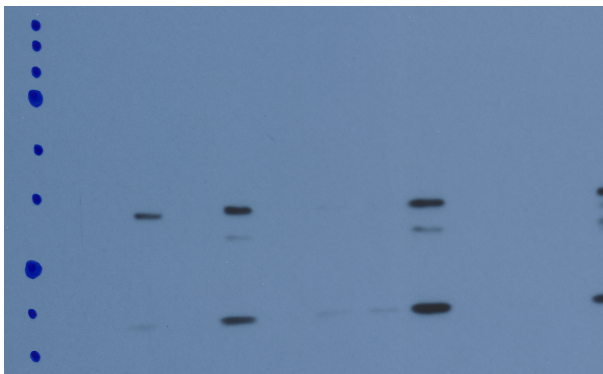

Figure 5D  
[Uncropped]

IL-1 $\beta$

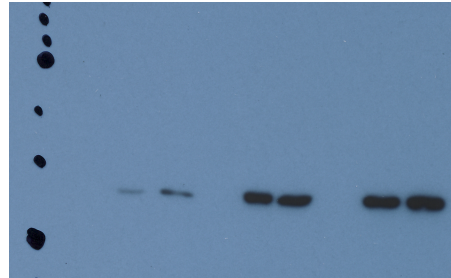

$\beta$ -actin

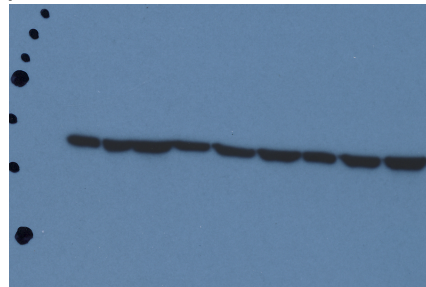

Figure 5E  
[Uncropped]

NLRP3 (top band)

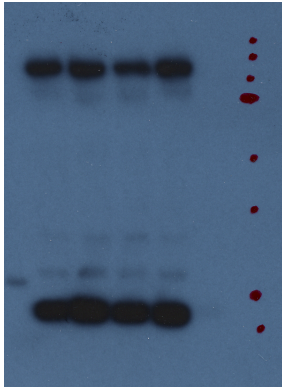

$\beta$ -actin (bottom band)

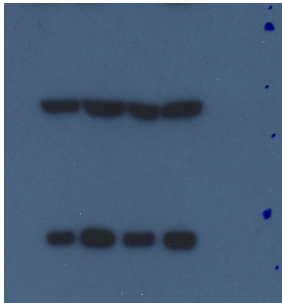

Figure 5F

IL-1 $\beta$  (short exposure)

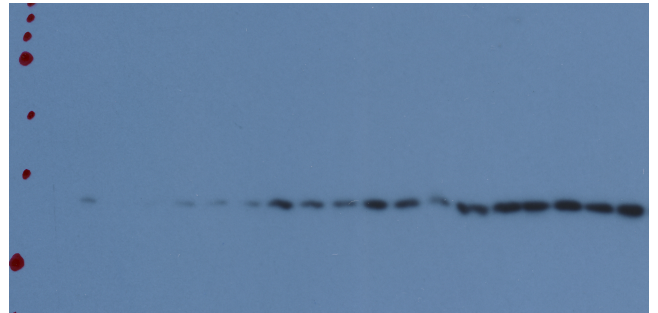

IL-1 $\beta$  (long exposure)

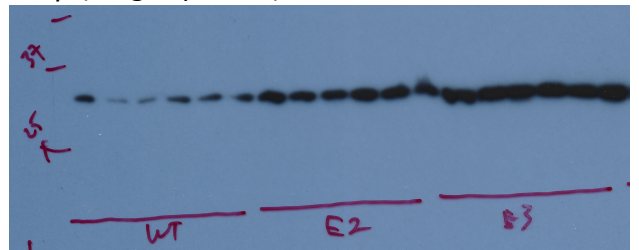

MCL-1

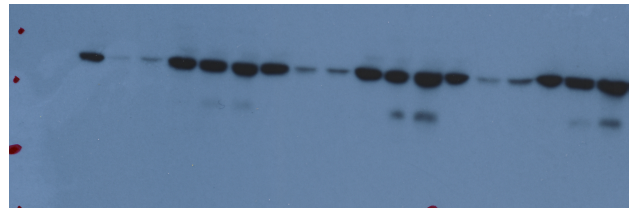

$\alpha$ -tubulin

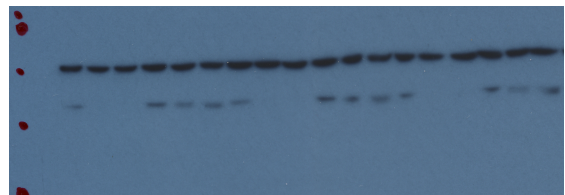

Figure 5G  
[Uncropped]

IL-1 $\beta$

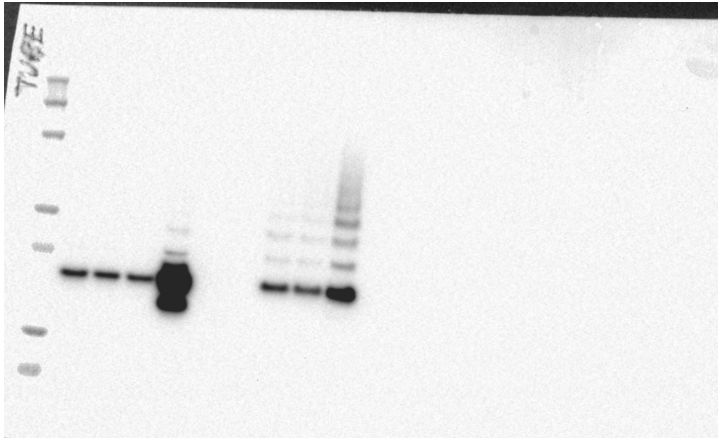

Ponceau

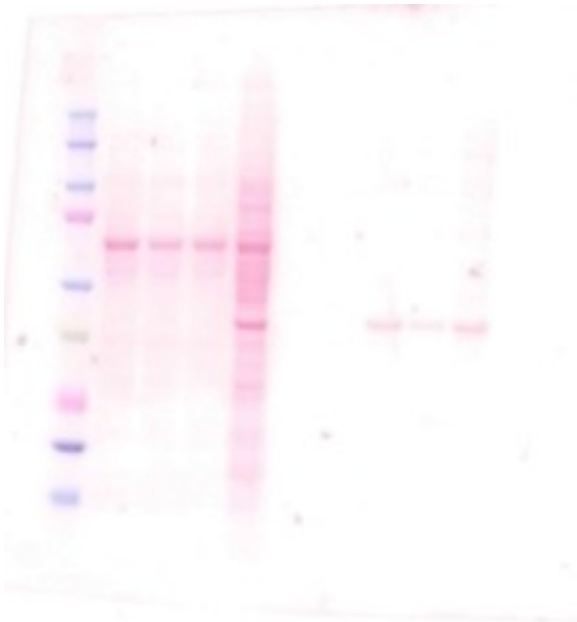

Supplement: LSA-2022-01735_SdataF5.pdf [file LSA-2022-01735_SdataF5.pdf]
