# Supplementary material for: FBXO11 governs macrophage cell death and inflammation in response to bacterial toxins
Source: PubMed Central journal article supplement (PMC10053445; doi:10.26508/lsa.202201735), 2023-03-28

Figure 1E  
[Uncropped]

FBXO11

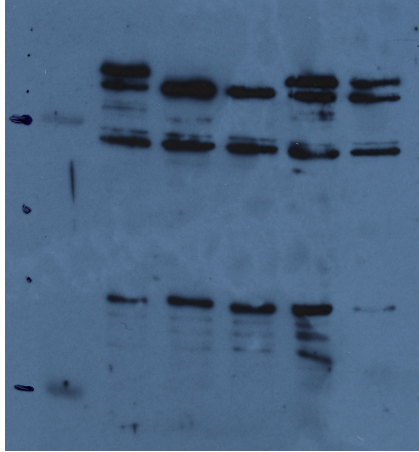

FBXO11 (longer exposure)

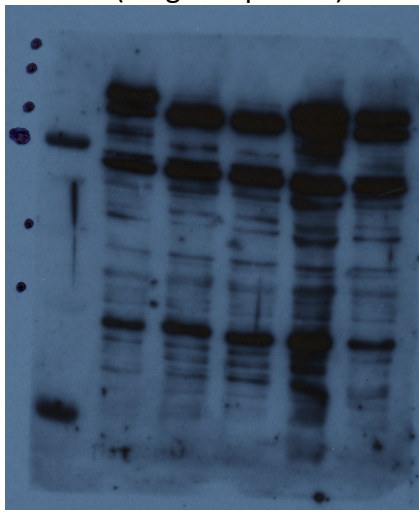

$\alpha$ -tubulin

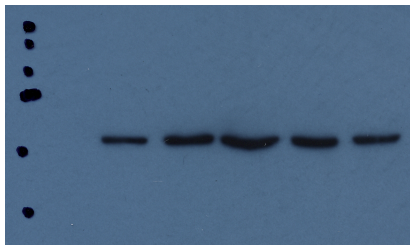

Figure 1F  
[Uncropped]

WT

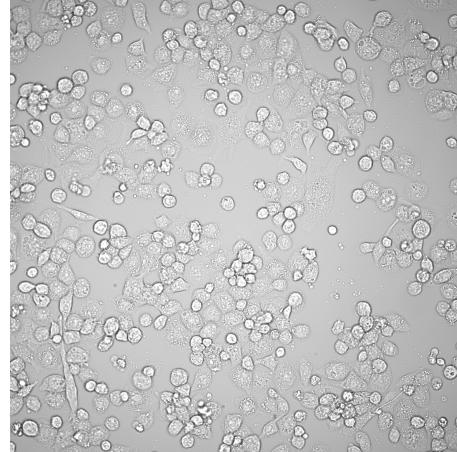

E2

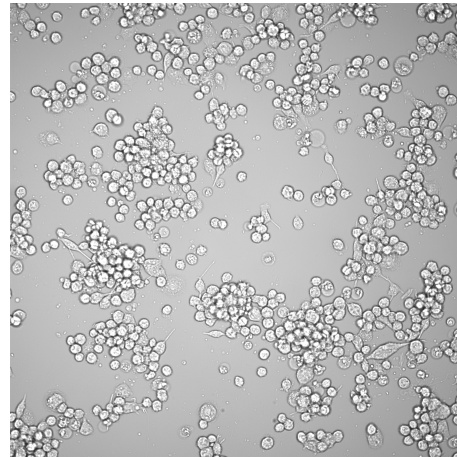

E3

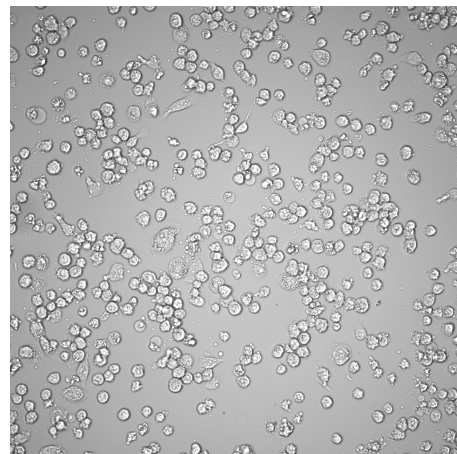

Supplement: LSA-2022-01735_SdataF1.pdf [file LSA-2022-01735_SdataF1.pdf]
