# Supplementary material for: FBXO11 governs macrophage cell death and inflammation in response to bacterial toxins
Source: PubMed Central journal article supplement (PMC10053445; doi:10.26508/lsa.202201735), 2023-03-28

Figure 2E  
[Uncropped]

C5aR1

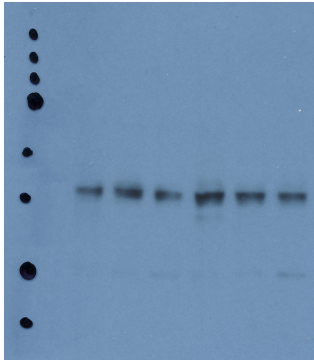

$\beta$ -actin (top bands)

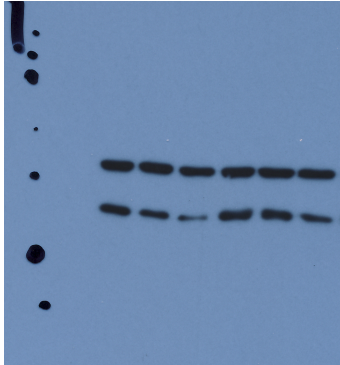

Supplement: LSA-2022-01735_SdataF2.pdf [file LSA-2022-01735_SdataF2.pdf]
