# Supplementary material for: FBXO11 governs macrophage cell death and inflammation in response to bacterial toxins
Source: PubMed Central journal article supplement (PMC10053445; doi:10.26508/lsa.202201735), 2023-03-28

Figure 4B  
[Uncropped]

C5aR1 (shorter and longer exposure)

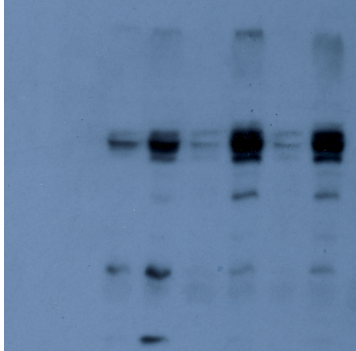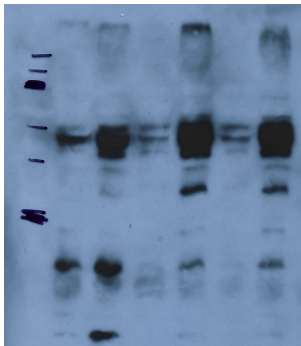

$\beta$ -actin

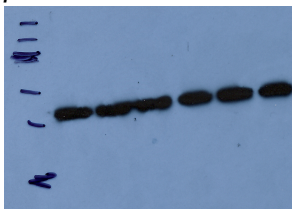

Supplement: LSA-2022-01735_SdataF4.pdf [file LSA-2022-01735_SdataF4.pdf]
