# Supplementary material for: FBXO11 governs macrophage cell death and inflammation in response to bacterial toxins
Source: PubMed Central journal article supplement (PMC10053445; doi:10.26508/lsa.202201735), 2023-03-28

Figure 6A  
[Uncropped]

BCL6

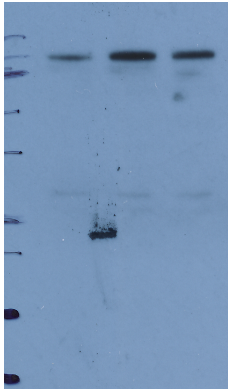

CD40

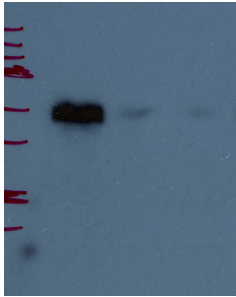

$\alpha$ -tubulin

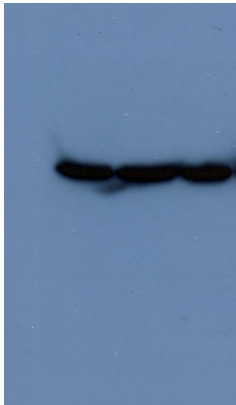

Figure 6D

BCL6

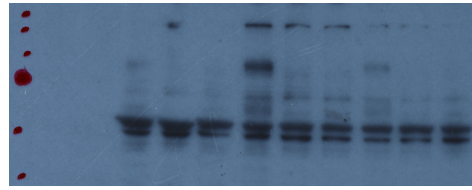

CD40

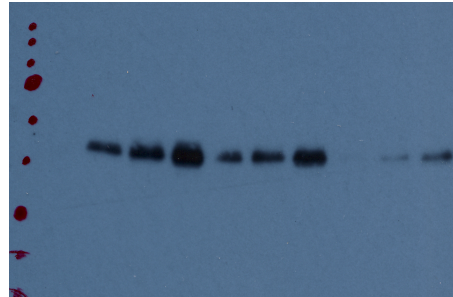

C5aR1

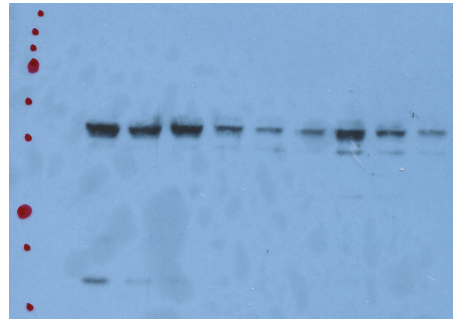

IL-1 $\beta$

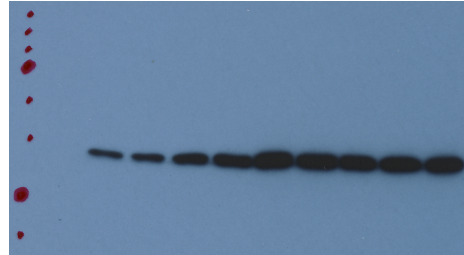

$\alpha$ -tubulin

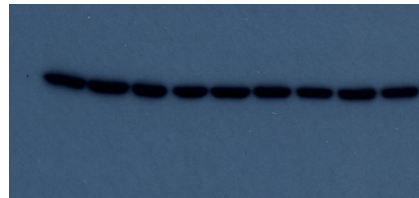

Supplement: LSA-2022-01735_SdataF6.pdf [file LSA-2022-01735_SdataF6.pdf]
