# Supplementary material for: FBXO11 governs macrophage cell death and inflammation in response to bacterial toxins
Source: PubMed Central journal article supplement (PMC10053445; doi:10.26508/lsa.202201735), 2023-03-28

Figure S2  
[Uncropped]

FBXO11 (top band)  
 $\alpha$ -tubulin (bottom band)

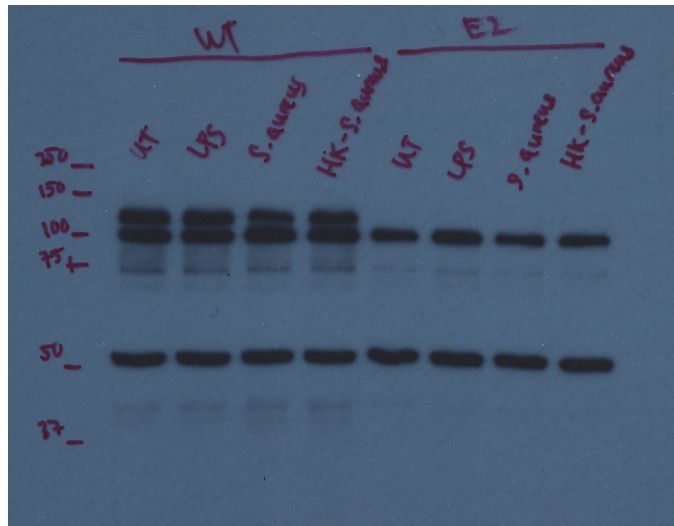

C5aR1

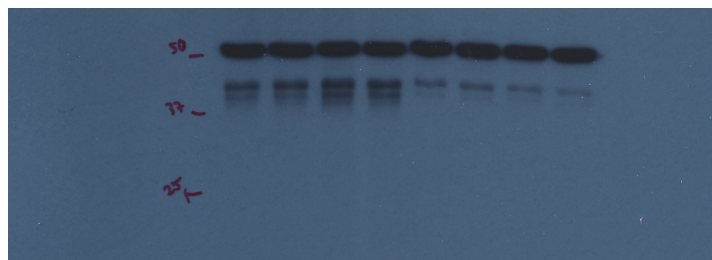

Supplement: LSA-2022-01735_SdataFS3.pdf [file LSA-2022-01735_SdataFS3.pdf]
